# Supplementary material
Source: publisher figshare collection journal article supplement (https://karger.figshare.com/ndownloader/files/30832213)
Supplement: Supplementary file 1 [file 30832213]

Supplementary Table 1 Summary of intraoperative and perioperative complications (prospective studies).

|  | **INTRAOPERATIVE COMPLICATIONS** | | | | **CLAVIEN DINDO I** | | **CLAVIEN DINDO II** | | | | **CLAVIEN DINDO III** | **CLAVIEN DINDO V** |  |
| --- | --- | --- | --- | --- | --- | --- | --- | --- | --- | --- | --- | --- | --- |
|  |
| **Author** | **Incomplete morcellation, n (%)** | **Capsular perforation, n (%)** | **Bladder injury, n (%)** | **Ureteric orifice injury, n (%)** | **Post-op urinary retention, n (%)** | **Hematuria/clot retention, n (%)** | **Heart failure/FA, n (%)** | **UTI/fever, n (%)** | **Post op anemia requiring transfusion, n (%)** | **Pneumonia, n (%)** | **Cystoscopy for clot evacuation, n (%)** | **post op death, n (%)** | **N. of Procedures** |
| Tan56 | Nd | Nd | Nd | nd | 5 (16,1) | 2 (6.5) | 0 | Nd | 0 | Nd | 0 | 0 | 31 |
| Kuntz55 | Nd | Nd | Nd | 4 (1.2) | Nd | 8 (2.3) | Nd | Nd | Nd | Nd | Nd | Nd | 346 |
| Montorsi53 | Nd | Nd | 10 (19.2) | Nd | 3 (5,8) | Nd | Nd | Nd | Nd | Nd | 1 (1.9) | Nd | 52 |
| Gupta50 | Nd | 1 (2) | 2 (4) | Nd | 2 (4) | Nd | Nd | 1 (2) | 0 | Nd | Nd | Nd | 50 |
| Wilson48 | Nd | Nd | Nd | Nd | 5 (16,1) | 0 | Nd | 0 | 0 | Nd | Nd | 0 | 31 |
| Vavassori44 | 2 (0.6) | Nd | 19 (5.8) | 1 (0.3) | 17 (5,2) | Nd | Nd | Nd | Nd | Nd | 8 (2.4) | Nd | 330 |
| Mavuduru40 | Nd | Nd | Nd | Nd | 1 (6,7) | 0 | Nd | Nd | Nd | Nd | Nd | Nd | 15 |
| Jeong41 | 0 | 5 (3.6) | 4 (2.9) | 0 | 9 (6,4) | 0 | 0 | 1 (0.7) | 2 (1.4) | 0 | 2 (1.4) | 0 | 140 |
| Zhang38 | Nd | Nd | Nd | Nd | Nd | Nd | Nd | nd | Nd | Nd | Nd | Nd | 62 |
| Becker36 | Nd | Nd | Nd | Nd | 6 (9,7) | 3 (4.8) | Nd | Nd | 1 (1.6) | Nd | Nd | 11 (17.7) | 62 |
| Kim33 | Nd | Nd | Nd | Nd | 24 (7,1) | 13 (3.9) | Nd | Nd | Nd | Nd | Nd | Nd | 336 |
| Sun30 | Nd | Nd | Nd | Nd | Nd | Nd | Nd | Nd | 1 (1.2) | Nd | Nd | Nd | 82 |
| Elkoushy28 | 21 (1.7) | 2 (0.2) | 12 (1) | 0 | 17 (1,4) | 16 (1.3) | Nd | 8 (0.7) | 15 (1.2) | Nd | Nd | 0 | 1216 |
| Fayad27 | 0 | 0 | 0 | 0 | 9 (15) | 0 | Nd | Nd | 0 | Nd | 0 | 0 | 60 |
| Elshal20 | 0 | 1 (1.1) | 0 | 0 | Nd | 2 (2,2) | Nd | 3 (3.3) | 2 (2.2) | Nd | Nd | 0 | 92 |
| Elshal19 | 0 | 2 (4) | 4 (8) | 0 | 1 (2) | 11 (22) | Nd | 0 | 0 | 0 | Nd | 0 | 50 |
| Comat17 | Nd | Nd | Nd | Nd | 13 (6,2) | 14 (6,6) | Nd | 5 (2.4) | 3 (1.4) | Nd | 1 (0.5) | 0 | 211 |
| Netsch14 | 2 (4.3) | Nd | 0 | 1 (2.2) | 4 (8,7) | 5 (10,9) | Nd | 1 (2.2) | 1 (2.2) | Nd | 2 (4.3) | 0 | 46 |
| Peyronnet11 | 0 | 1 (1) | 2 (2) | 1 (1) | 9 (9) | 5 (5) | 0 | 3 (3) | 4 (4) | 0 | 1 (1) | 0 | 100 |
| Umari11 | Nd | Nd | Nd | Nd | 1 (2,2) | 0 | Nd | Nd | 0 | Nd | 1 (2.2) | 0 | 45 |
| Elshal64 | Nd | Nd | Nd | Nd | Nd | 2 (1,7) | Nd | 1 (0.8) | 0 | Nd | 1 (0.8) | 0 | 121 |
| Enikeev62 | 2 (6,6) | 13 (43.3) | Nd | 2 (6.7) | 0 | 1 (3,3) | Nd | 3 (10) | 0 | Nd | 1 (3.3) | 0 | 30 |
| Ibraihim43 | 1 (1.2) | Nd | 4 (4.9) | Nd | Nd | Nd | Nd | Nd | Nd | Nd | Nd | 0 | 82 |
| Miernik21 | Nd | Nd | Nd | Nd | 7 (6,1) | Nd | Nd | Nd | 0 | Nd | Nd | 0 | 114 |
| **Total included** | **1704** | **1678** | **1970** | **852** | **2889** | **2641** | **0** | **1906** | **1949** | **0** | **1075** | **62** |  |
| **patients** |  |  |  |  |  |  |  |  |  |  |  |  |  |
| **Overall complication** | **28 (1,5)** | **25 (1,5)** | **55 (2,8)** | **9 (1)** | **133 (4,6)** | **82 (3,1)** | **0** | **23 (1,2)** | **29 (1,5)** | **0** | **18 (1,7)** | **11 (17.7)** |  |
